# Supplementary material
Source: Springer Nature journal article supplement (https://www.springermedizin.de/resource/supplementary/12865_2010_342_MOESM7_ESM.pdf/9427792)

**A.**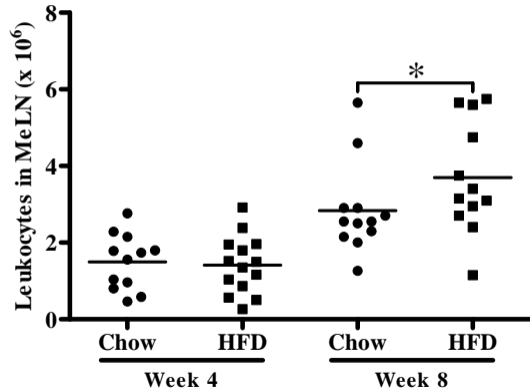**B.**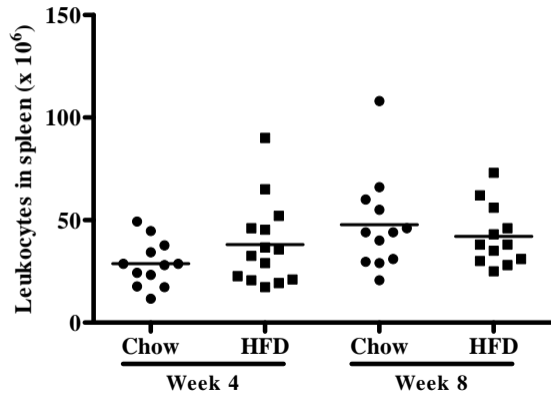

Supplement: MOESM7 [file 9427792]
